# Supplementary material
Source: publisher figshare collection journal article supplement (https://acs.figshare.com/ndownloader/files/5037547)
Supplement: Supplementary file 1 [file 5037547]

## **SUPPORTING INFORMATION**

# Surface engineered zeolite: An active interface for rapid adsorption and degradation of toxic contaminants in water

*Ruchi Shaw<sup>[a]</sup>, Richa Sharma<sup>[a]</sup>, Sangeeta Tiwari<sup>\*[a]</sup> and Sandeep Kumar Tiwari<sup>[b]</sup>*

<sup>[a]</sup>Ruchi Shaw, Richa Sharma and Sangeeta Tiwari<sup>\*</sup>

Amity Institute of Applied Sciences

Amity University, Noida, India-201303

Email<sup>\*</sup> : [stiwari2@amity.edu](mailto:stiwari2@amity.edu)

<sup>[b]</sup>Sandeep Kumar Tiwari

Council of Scientific and Industrial Research,

New Delhi, India -110001

**S 1:** It gives the Raman spectra of the Ze/ZnO CSPs. The peak at  $432\text{ cm}^{-1}$  correspond to the typical ZnO band edge. The small intensity peak at  $581\text{ cm}^{-1}$  is found in ZnO:N doped materials. Other peaks at  $508\text{ cm}^{-1}$ ,  $645\text{ cm}^{-1}$ ,  $854\text{ cm}^{-1}$  may be considered as local vibrational peaks of Raman and their intensities are related to the concentration of the nitrogen in the Ze/ZnO CSPs.

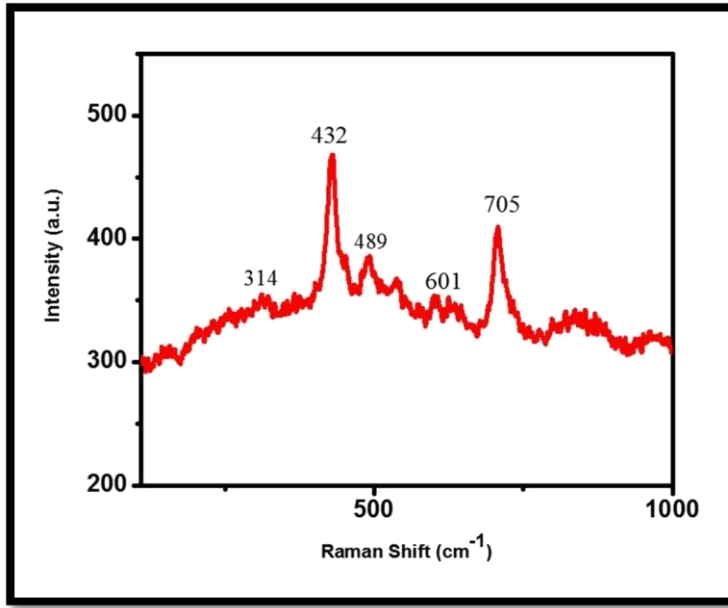

Figure S 1. Raman spectra of the Ze/ZnO CSPs

**S 2:** It gives the compositional analysis of the Ze/ZnO CSPs as compared to the pristine zeolite. The compositions of the materials has been studied using EDAX and ICP methods. It has been confirmed using both the studies that no traces of ZnO are present in the pristine zeolite (CBV 500).

| Element | EDAX     |          |             |          | ICP      |             |
|---------|----------|----------|-------------|----------|----------|-------------|
|         | Zeolite  |          | Ze/ZnO CSPs |          | Zeolite  | Ze/ZnO CSPs |
|         | Weight % | Atomic % | Weight %    | Atomic % | Weight % | Weight %    |
| OK      | 46.94    | 60.59    | 50.40       | 69.60    | -        | -           |
| AlK     | 12.85    | 09.83    | 8.13        | 6.66     | 8.84     | 5.33        |
| SiK     | 40.22    | 29.57    | 21.67       | 17.05    | 29.97    | 20.28       |
| ZnK     | 0.0      | 0.0      | 19.80       | 6.69     | 0        | 4.40        |

Table S 1. Elemental composition of zeolite and Ze/ZnO CSPs particles taken using EDAX and ICP analysis.

**S 3:** It gives the BET adsorption isotherm for the Ze/ZnO CSPs and the zeolite. BET analysis confirms that there has been no change in the surface adsorption characteristics of the zeolite even after the formation of the ZnO thereby inferring that the porosity of the zeolite is maintained as such in the material

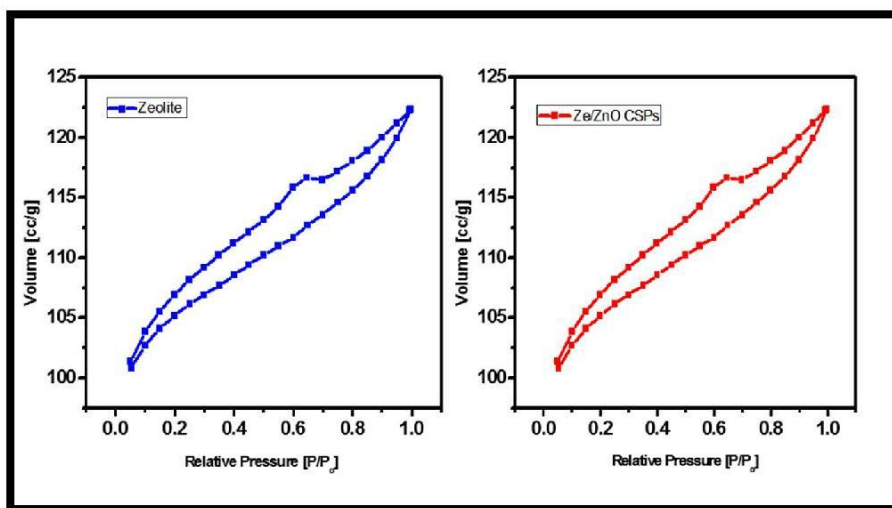

Figure S 2. BET adsorption isotherm of zeolite and ZnO CSPs

**S 4:** It describes the experimental setup used for the photodegradation process. Fig (a) shows the blue MB dye solution at the start of the process and Fig (b) marks the complete conversion of MB dye into its less harmful counterparts thereby changing the color of the solution from blue to milky white. Pure water is obtained by separating the CSPs thereafter from this solution.

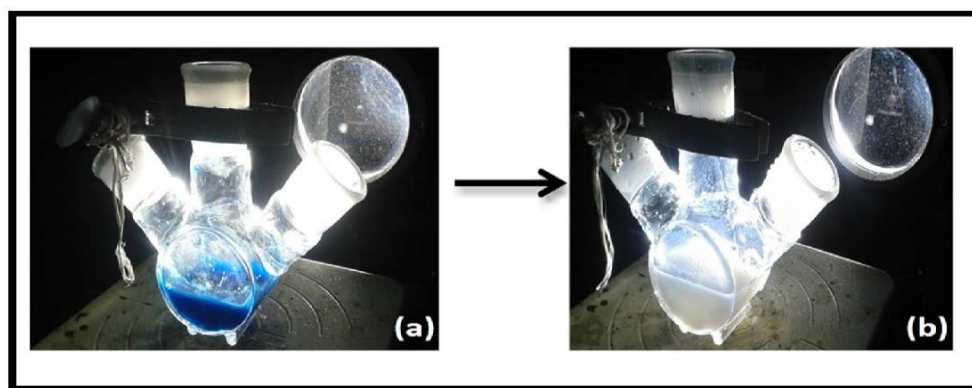

**Figure S 3.** Photodegradation using solar simulator (a) before photodegradation (b) after photodegradation (75 mins)

**S 5:** It describes the UV spectra of the solutions taken after adsorption of the MB dye by the Ze/ZnO CSPs. It can be inferred from the spectra that the Ze/ZnO CSPs are able to adsorb upto 300 ppm of the dye solution after which the MB peak starts appearing.

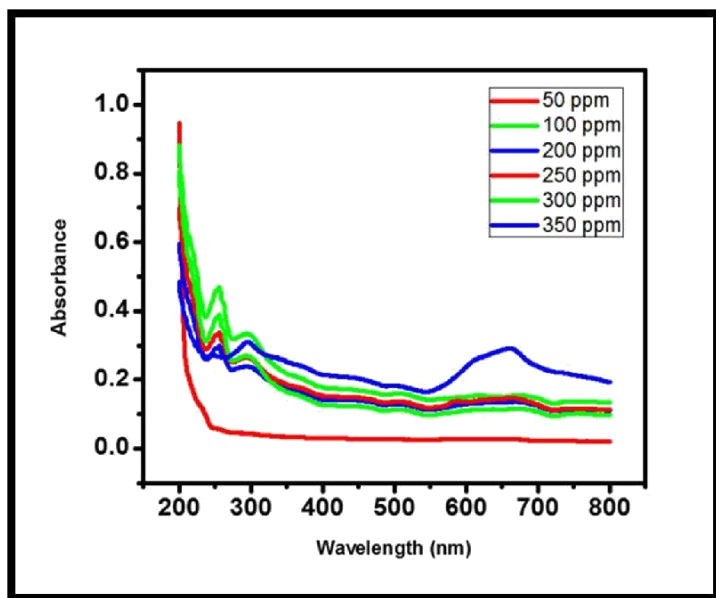

**Figure S 4.** UV-visible spectra of the solutions after adsorption of MB dye by the Ze/ZnO CSPs.

**S 6.** It describes the length of zone of inhibition of the Ze/ZnO CSPs for E.Coli, S.Aureus and Pseudomonas.

| Bacteria    | Length of zone of inhibition |
|-------------|------------------------------|
| E.Coli      | 4.5 mm                       |
| S.Aureus    | 4 mm                         |
| Pseudomonas | 4.5 mm                       |

**Table S 2.** Length of zone of inhibition of Ze/ZnO CSPs.

### **S 7. Diffusivity and Intra-particle diffusion model**

Adsorption kinetics is determined by four major steps which are diffusion of molecules from the bulk of the liquid towards the solid-liquid interface, thereafter diffusion inside the pores and diffusion of molecules along the surface and lastly the attainment of adsorption desorption equilibrium<sup>1</sup>. Thus, the overall adsorption process is generally controlled by one or more steps such as film diffusion, pore diffusion, surface diffusion or combination of these steps. The possibility of intra particle diffusion can be confirmed using intra-particle diffusion model. According to this model, the amount of material adsorbed at time t,  $q_t$  is:

$$Q_t = k_{id} * t^{1/2} + \Theta - (6)$$

Where  $k_{id}$  is the intra-particle diffusion rate constant ( $\text{mg}/(\text{g min}^{1/2})$ ) and  $\Theta$  ( $\text{mg/g}$ ) relates to the thickness of the boundary layer. The larger the value of  $\Theta$ , the greater is the boundary layer effect. A straight line in the plot of  $q_t$  vs.  $t^{1/2}$  suggests that the adsorption is taking place by intra-particle diffusion only whereas multiple linear plots tell that two or more steps are influencing the entire adsorption process<sup>2</sup>.

Fig S 5 (a) gives the plot of  $q_t$  vs.  $t^{1/2}$  for the adsorption of Pb (II) by the zeolite and the Ze/ZnO CSPs and Fig S 5(b) gives a plot of  $q_t$  vs.  $t^{1/2}$  for the adsorption of MB dye by the zeolite, ZnO NF and the Ze/ZnO CSPs. It is observed that in all the cases, the data plots are related by multi straight lines. The first straight line depicts the macro pore and the mesopores diffusion whereas the second straight line depicts the micropore diffusion<sup>2</sup>. Deviations from the origin as observed in the plots suggest the difference in the rate of mass transfer in the initial and the final stages of the adsorption and also that the pore diffusion is not the sole rate controlling step<sup>3</sup>. Probably, the diffusion of the ions from the adsorbent-solution interface as well as the adsorption on the available surface of the adsorbent is responsible for the overall adsorption process. The multilinearity associated with the plots indicate that initially the adsorption is governed by the film diffusion; boundary layer effect which is followed by intra-particle diffusion stage and the final uptake is governed by the pore-diffusion mechanism. The low  $R^2$  value for the plot of Ze-ZnO CSPs for Pb (II) and MB dye adsorption and intercept corresponding to the thickness of the boundary layer  $\neq 0$  also indicate that intra-particle diffusion is not the sole reason of adsorption. The slope of the plot gives the rate parameter and it was calculated to be  $1.3924 \text{ mg}/(\text{g min}^{1/2})$  for zeolite and  $1.6183 \text{ mg}/(\text{g min}^{1/2})$  for the Ze/ZnO CSPs in case of Pb (II) adsorption. For MB dye adsorption, the rate parameter was calculated to be  $0.9582 \text{ mg}/(\text{g min}^{1/2})$  for zeolite,  $0.9581 \text{ mg}/(\text{g min}^{1/2})$  for ZnO NF and  $0.9219 \text{ mg}/(\text{g min}^{1/2})$  for CSPs. It is the characteristic of the region where the intra particle diffusion is the rate controlling step. Thus it can be inferred that the adsorbent CSP follows both the diffusion as well as the adsorption of the analyte from the solution.

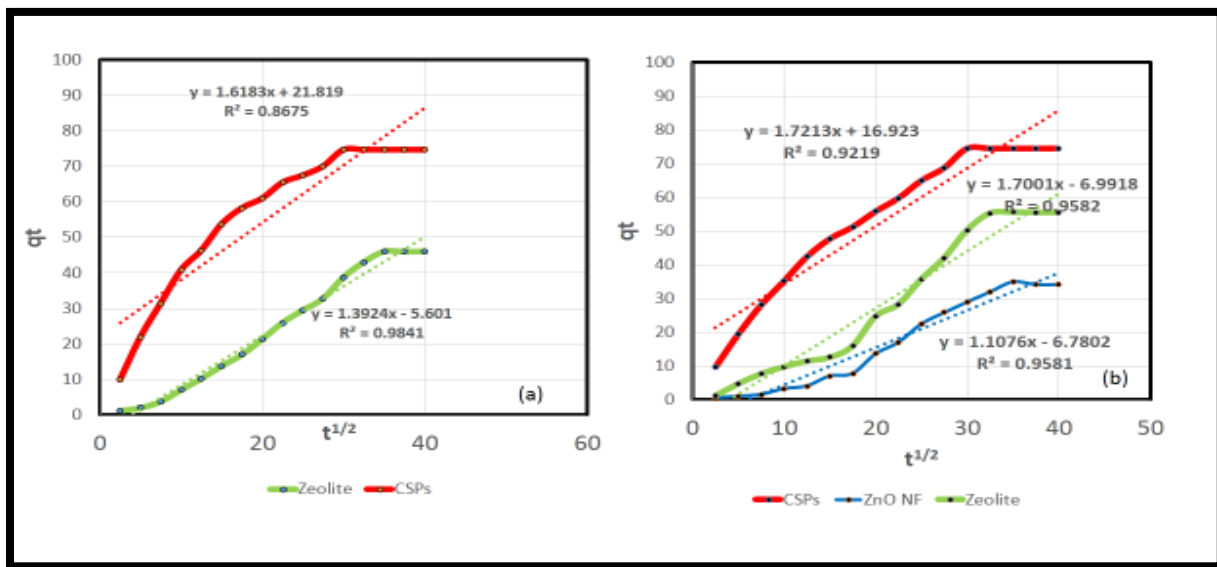

**Figure S 5.** Intra-particle diffusion plot for (a) for Pb (II) adsorption (b) for MB dye adsorption

## S 8. Possible mechanism for effective dye degradation

Adsorption is a pre-requisite for efficient photodegradation of dyes. Methylene blue dye having general formula  $(C_{16}H_{18}N_3S)^+Cl^-$  consists of a positive phenothiazine part which dissociates from the negative chloride ion in water in order to dissolve. Moreover, the surface of the Ze-ZnO CSPs is negatively charged with a zeta potential of -7. The negative surface charge attracts the positive phenothiazine part of the MB molecule. Because of organophilic nature of Zeolite, the aromatic MB molecules diffuse through the porous structure of the CSPs and adsorb on the surface of the zeolite. The synergy of zeolite core and ZnO shell play a significant role in enhanced adsorption of the MB dye. The adsorbed dye lies at the interface of core and shell. The lifetime decay data of the Ze-ZnO CSPs and the pure ZnO nanoflakes shows that the average lifetime of the CSPs to be 3.920 ns which is higher than that of the ZnO nanoflakes (0.1657 ns). The close proximity of adsorbed dye and enhanced life time of CSPs ensures high rate of decomposition of dye.

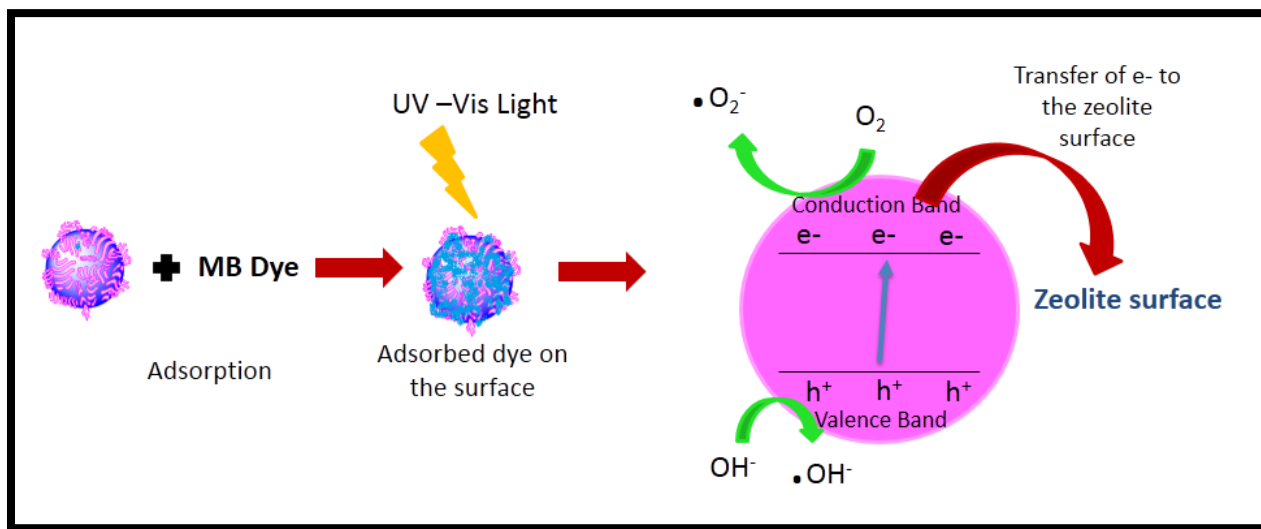

Fig S 6 Proposed mechanism for the photodegradation of the MB dye by the Ze/ZnO CSPs

## S 9. Mechanism of the anti-bacterial activity of the synthesized material.

Nano ZnO particles are reported for anti-bacterial activity<sup>12,13</sup>. The interaction of the ZnO nanoflakes with the cell membrane causes damage to the cell resulting in leakage of the bacterial cell components. Release of  $Zn^{2+}$  ions and production of highly reactive oxygen species such as  $H_2O_2$  oxidizes the cell components resulting in permanent damage to cells.

### S.10 Error analysis

Graphs with the error bars are attached below. These are also included in the supplementary information file. The standard deviation method was used for calculating the data error and the corresponding standard deviation values have been given in Table 5.

I. Error bar shown for Fig 4(a)  $t$  vs.  $q_t$  for Pb (II) adsorption by the zeolite and the CSPs

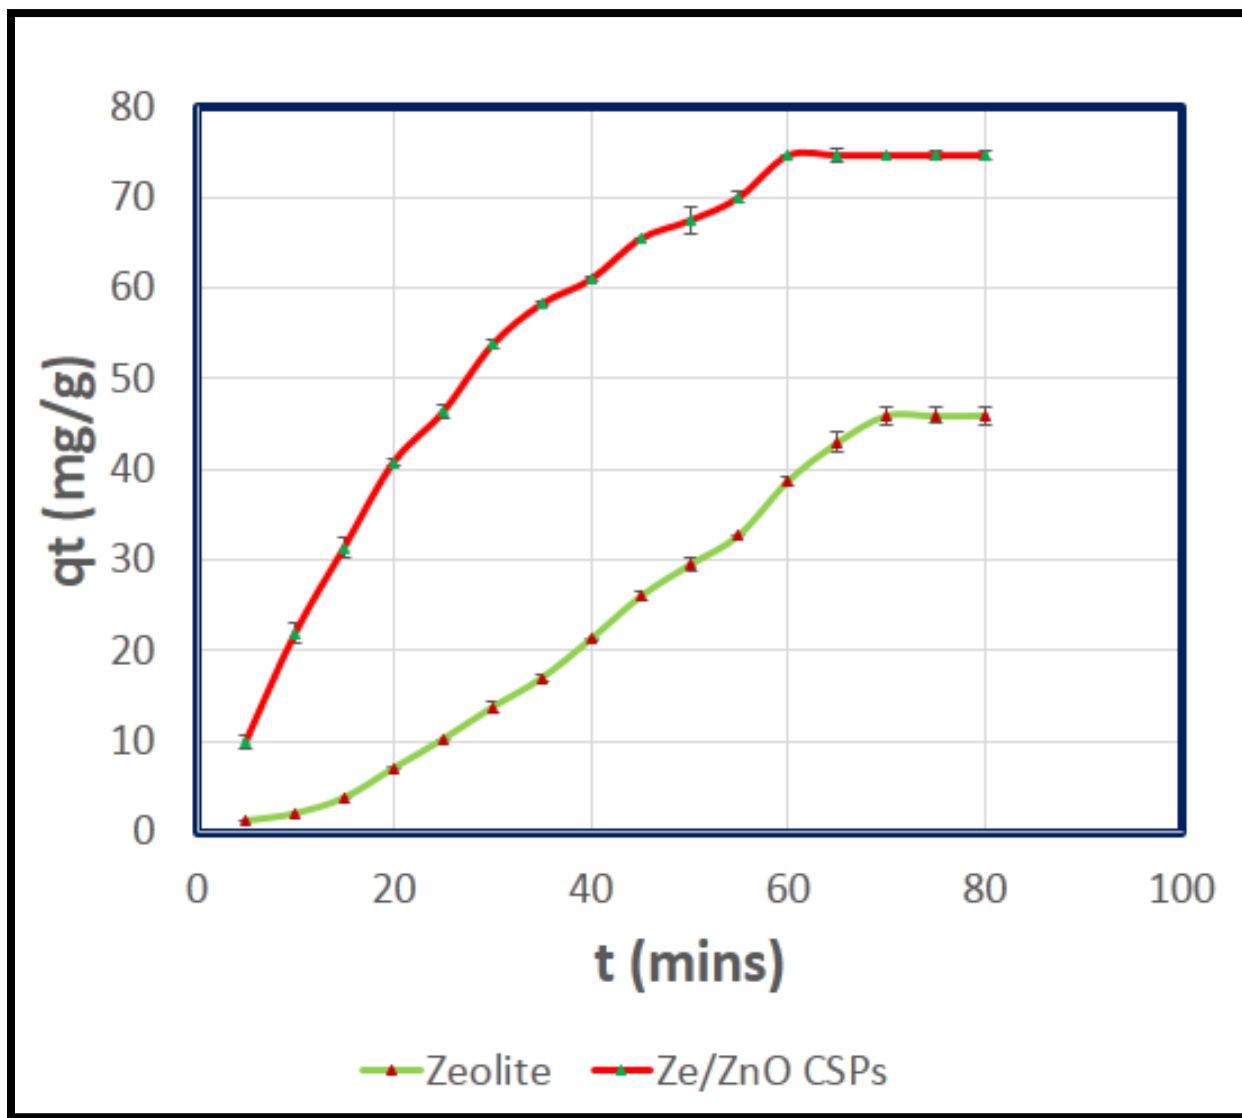

Fig 4 (a) in the main manuscript

| <b>Ze/ZnO CSPs</b> |                    | <b>Zeolite</b> |                    |
|--------------------|--------------------|----------------|--------------------|
| Mean Qt value      | Standard Deviation | Mean Qt Value  | Standard Deviation |
| 9.898              | 0.085              | 1.208          | 0.716              |
| 21.854             | 0.051              | 1.997          | 1.125              |
| 31.368             | 0.021              | 3.747          | 1.196              |
| 40.77              | 0.0583             | 7.019          | 0.328              |
| 46.3125            | 0.0112             | 10.2005        | 0.678              |
| 53.719             | 0.535              | 13.733         | 0.525              |
| 58.249             | 0.407              | 16.957         | 0.231              |
| 60.97              | 0.1344             | 21.268         | 0.156              |
| 65.421             | 0.519              | 25.945         | 0.056              |
| 67.452             | 0.763              | 29.457         | 1.591              |
| 70                 | 0.0288             | 32.747         | 0.65               |
| 74.661             | 0.528              | 38.722         | 0.005              |
| 74.662             | 1.092              | 42.967         | 0.806              |
| 74.661             | 1                  | 45.96          | 0.014              |
| 74.663             | 0.907              | 45.918         | 0.416              |
| 74.662             | 1.001              | 45.968         | 0.504              |

II. Error bar shown for Fig 5 (a) Ce vs. qe for Pb (II) adsorption by the zeolite and the CSPs

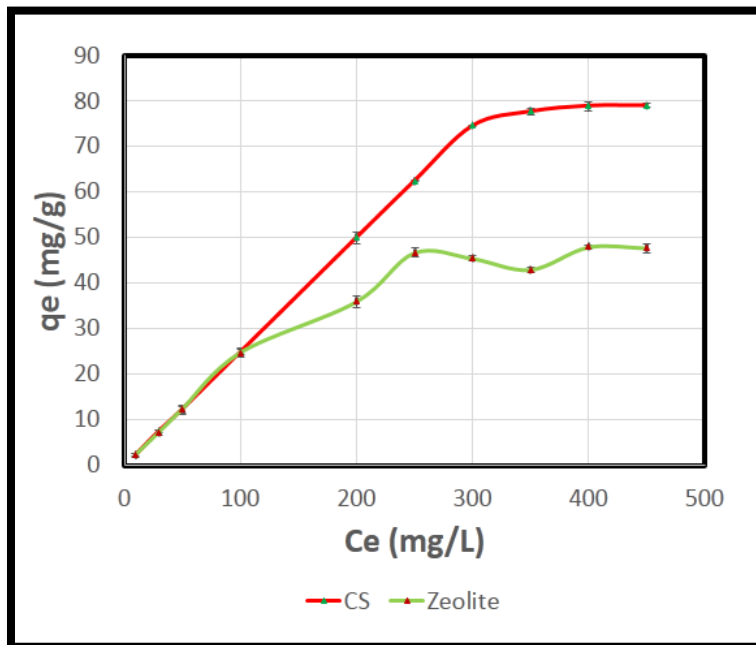

Fig 5 (a) in the main manuscript



| <b>Ze/ZnO CSPs</b> |                    | <b>Zeolite</b> |                    |
|--------------------|--------------------|----------------|--------------------|
| Mean Qe value      | Standard Deviation | Mean Qe Value  | Standard Deviation |
| 2.267              | 0.367              | 2.254          | 0.446              |
| 7.49               | 0.359              | 7.182          | 0.577              |
| 12.252             | 0.755              | 12.253         | 1.047              |
| 24.82              | 0.523              | 24.724         | 0.928              |
| 49.956             | 1.389              | 35.929         | 1.197              |
| 62.42              | 0.196              | 46.71          | 1.042              |
| 74.525             | 0.1504             | 45.457         | 0.659              |
| 77.67              | 0.628              | 42.99          | 0.5216             |
| 78.92              | 0.9937             | 47.973         | 0.5104             |
| 79.005             | 0.3919             | 47.752         | 1.0176             |

III. Error bar shown for Fig 6 (a) ; t vs. qt for the adsorption of MB dye by the zeolite, ZnO NF and the Ze/ZnO CSPs

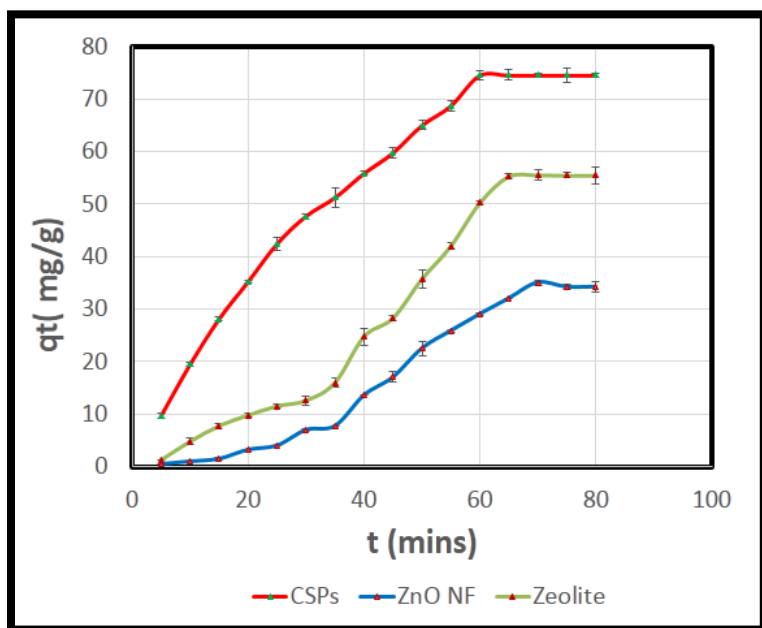

Fig 6 (a) in the main manuscript

| Ze/ZnO CSPs   |                    | Zeolite       |                    | ZnO NF        |                    |
|---------------|--------------------|---------------|--------------------|---------------|--------------------|
| Mean Qt value | Standard Deviation | Mean Qt Value | Standard Deviation | Mean Qt Value | Standard Deviation |
| 9.722         | 0.5144             | 1.2177        | 0.0616             | 0.47          | 0.0062             |
| 19.509        | 0.4251             | 4.762         | 0.6102             | 0.97          | 0.0086             |
| 28.14         | 0.4134             | 7.712         | 0.5206             | 1.474         | 0.1527             |
| 35.222        | 0.1786             | 9.749         | 0.3891             | 3.209         | 0.08775            |
| 42.46         | 1.2297             | 11.484        | 0.4194             | 3.999         | 0.0557             |
| 47.718        | 0.4916             | 12.545        | 0.83               | 6.969         | 0.1674             |
| 51.249        | 1.8604             | 15.012        | 0.8419             | 7.724         | 0.0585             |
| 55.855        | 0.4254             | 24.745        | 1.5942             | 13.57         | 0.0363             |
| 59.76         | 1.01               | 28.27         | 0.603              | 16.997        | 0.9992             |
| 64.999        | 0.8471             | 35.72         | 1.724              | 22.467        | 1.299              |
| 68.721        | 1.01               | 41.999        | 0.685              | 25.842        | 0.2992             |
| 74.532        | 0.956              | 50.219        | 0.3395             | 29.017        | 0.2644             |
| 74.531        | 0.9994             | 55.27         | 0.5412             | 31.993        | 0.10622            |
| 74.531        | 0.3059             | 55.547        | 0.9712             | 35.018        | 0.4627             |
| 74.531        | 1.303              | 55.477        | 0.5482             | 34.184        | 0.5063             |
| 74.532        | 0.4317             | 55.47         | 1.563              | 34.201        | 0.9644             |

IV. Error bar shown for the Fig 7 (a) ;  $C_e$  vs.  $q_e$  for the adsorption of MB dye by the zeolite, ZnO NF and the Ze/ZnO CSPs

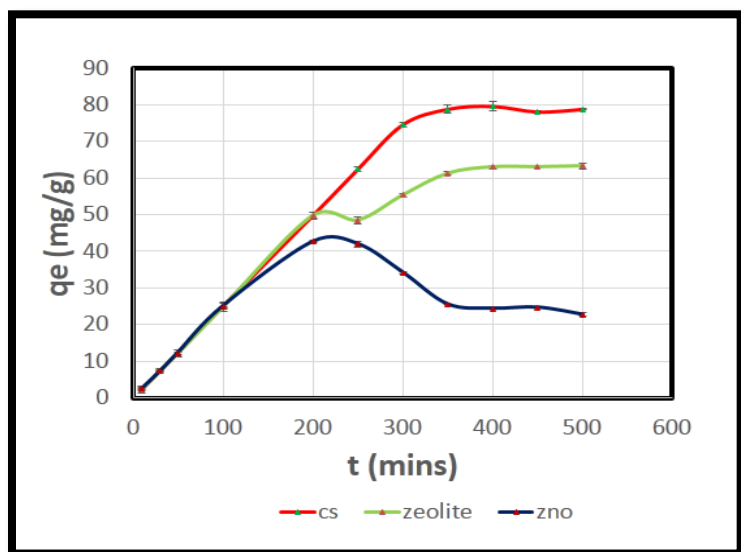

Fig 7 (a) in the main manuscript

| Ze/ZnO CSPs   |                    | Zeolite       |                    | ZnO NF        |                    |
|---------------|--------------------|---------------|--------------------|---------------|--------------------|
| Mean Qe value | Standard Deviation | Mean Qe Value | Standard Deviation | Mean Qe Value | Standard Deviation |
| 2.309         | 0.891              | 2.343         | 0.5151             | 2.471         | 0.0925             |
| 7.2815        | 0.1919             | 7.351         | 0.1504             | 7.179         | 0.6265             |
| 12.253        | 0.9584             | 12.185        | 0.276              | 12.253        | 0.951              |
| 24.952        | 0.7507             | 24.774        | 0.1107             | 24.979        | 1.2826             |
| 49.707        | 0.7901             | 49.701        | 1.0238             | 42.547        | 0.312              |
| 62.317        | 0.6517             | 48.445        | 0.9908             | 41.968        | 0.8312             |
| 74.53         | 0.5986             | 55.27         | 0.4417             | 34.184        | 0.3318             |
| 78.78         | 1.2237             | 61.195        | 0.4986             | 25.497        | 0.1302             |
| 79.567        | 1.3299             | 62.951        | 0.4229             | 24.347        | 0.1402             |
| 78.042        | 0.4292             | 62.99         | 0.1865             | 24.647        | 0.0984             |
| 78.76         | 0.109              | 63.223        | 0.6995             | 22.685        | 0.5501             |

V. Error bar shown for % photodegradation of MB dye by the Ze/ZnO CSPs

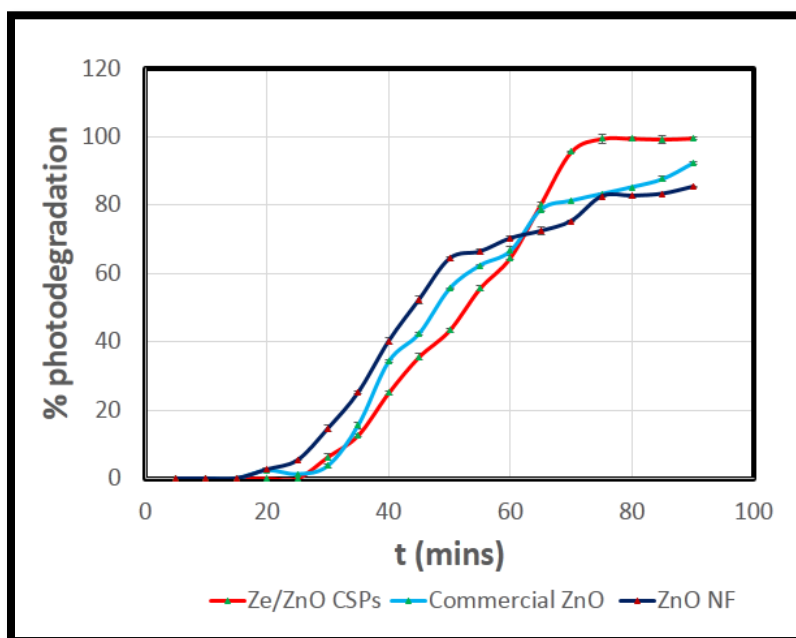

Fig 9 in the main manuscript

| Ze/ZnO CSPs        |                    | Commercial ZnO     |                    | ZnO NF             |                    |
|--------------------|--------------------|--------------------|--------------------|--------------------|--------------------|
| % photodegradation | Standard Deviation | % photodegradation | Standard Deviation | % photodegradation | Standard Deviation |
| 0                  | 0                  | 0                  | 0                  | 0                  | 0                  |
| 0                  | 0.0005             | 0                  | 0.0003             | 0                  | 0                  |
| 0                  | 0.0005             | 0                  |                    | 0.05               | 0.0374             |
| 0                  | 0                  | 2.36               | 0.5985             | 2.654              | 0.3985             |
| 1.00E-03           | 6.00E-04           | 1.238              | 0.36               | 5.328              | 0.0802             |
| 6.28               | 0.9248             | 3.687              | 0.6909             | 14.602             | 0.9184             |
| 12.625             | 0.4169             | 15.569             | 1.0233             | 25.215             | 0.2937             |
| 25.025             | 0.643              | 34.215             | 0.3143             | 40.201             | 1.0834             |
| 35.56              | 1.02               | 42.365             | 0.3863             | 52.364             | 1.0992             |
| 43.32              | 0.5004             | 55.521             | 0.336              | 64.325             | 0.6002             |
| 55.59              | 0.6871             | 62.312             | 0.1356             | 66.3654            | 0.8655             |
| 64.64              | 0.5382             | 66.556             | 1.147              | 70.254             | 0.6022             |
| 80.28              | 0.5889             | 78.659             | 0.3491             | 72.365             | 1.1795             |
| 95.62              | 0.0951             | 81.248             | 0.1131             | 75.321             | 0.1601             |
| 99.39              | 1.2143             | 83.234             | 0.2703             | 82.548             | 0.2772             |
| 99.46              | 0.5825             | 85.234             | 0.3005             | 82.654             | 0.4803             |
| 99.23              | 1.1172             | 87.569             | 0.796              | 83.265             | 0.2138             |
| 99.53              | 0.2446             | 92.238             | 0.3609             | 85.325             | 0.2354             |

#### VI. Error bar shown for the recyclability of the CSPs

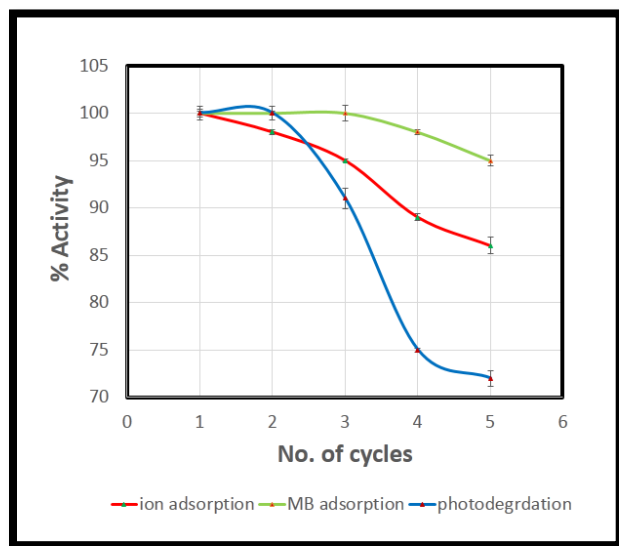

Fig 10 in main manuscript

| Ion Adsorption |                    | MB Adsorption |                    | Photodegradation |                    |
|----------------|--------------------|---------------|--------------------|------------------|--------------------|
| % Activity     | Standard Deviation | % Activity    | Standard Deviation | % Activity       | Standard Deviation |
| 100            | 0.4405             | 100           | 0.6975             | 100              | 0.1997             |
| 98             | 0.2416             | 100           | 0.202              | 100              | 0.6989             |
| 95             | 0.1883             | 100           | 0.7853             | 91               | 1.068              |
| 89             | 0.3465             | 98            | 0.2861             | 75               | 0.21388            |
| 86             | 0.8652             | 95            | 0.5511             | 72               | 0.8451             |

The error analysis for Table 1 could not be performed as the system for BET analysis is presently out of order and will take time to become operational.

### S 11. Studies on the change in pH of the solution after addition the adsorbents

The zeolite and the Ze-ZnO CSPs are insoluble in water and do not affect the pH of the solution. The zeolite Y (CBV 500) when dispersed in water shows a pH of 7.75. Ze-ZnO CSPs when dispersed in water gives a pH of 7.35. Solution of Pb (II) ions in water is mildly acidic in nature with a pH of 6.09. As zeolite and the CSPs do not affect the pH of the Pb(II) solution, the pH of Pb(II) sample solutions remained almost same after the addition of the adsorbent particles as indicated in table below . Also, no precipitation was observed after the addition of the adsorbents (zeolite/CSPs) into the Pb (II) solutions.

**Table S 3.**

| Material                       | pH   |
|--------------------------------|------|
| Blank                          | 7.02 |
| Zeolite                        | 7.75 |
| Ze/ZnO CSPs                    | 7.35 |
| Pb (II) solution               | 6.09 |
| Zeolite in Pb (II) solution    | 6.30 |
| Ze/ZnO CSPs in Pb(II) solution | 6.14 |

In order to study the effect of the pH on the adsorption of Pb (II) ions from water, pH variation study was conducted. The solutions were tested for adsorption by zeolite and CSPs at a wide pH range of 2-9. The pH of the test solutions were adjusted by using 0.1M HCl and 0.1M NaOH solutions. Complete adsorption of the Pb (II) ions takes place at a pH of 6.5-7.

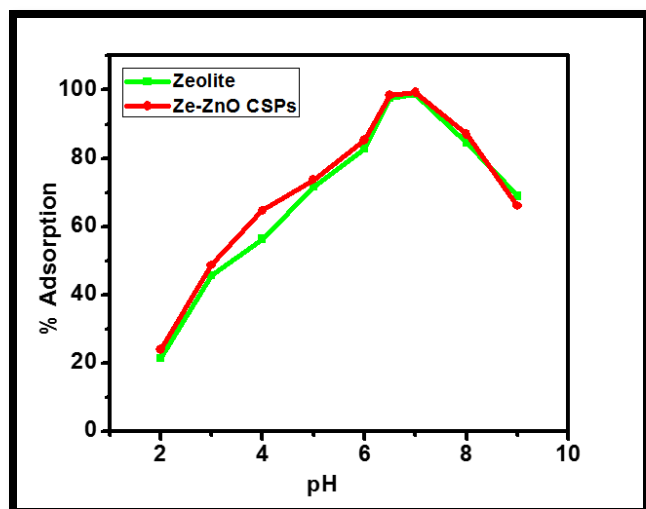

Fig S 7. pH variation plot for the adsorption of Pb(II) by the zeolite and the CSPs

## References

1. Suresh ,S.; Sundaramoorthy, S.Green Chemical Engineering: An Introduction to Catalysis, Kinetics, and Chemical Processes
2. Esan ,O S.; Abiola, O. N .; Owoyomi, O .; Aboluwoye ,C. O.; Osundiya ,M .O.Adsorption of Brilliant Green onto Luffa Cylindrical Sponge: Equilibrium, Kinetics, and Thermodynamic Studies ISRN Phys. Chem. 2014,2014
3. Ahmad,M. A.; Puad, N. A. A.; Bello,O.S. Kinetic, Equilibrium and Thermodynamic Studies of Synthetic Dye Removal using Pomegranate Peel Activated Carbon prepared by Microwave-induced KOH Activation Water Res. & Ind. 2014, 6,18-35
4. Xie Y.; He Y.; Irwin P. L.; Jin, T.; Shi, X.; Antibacterial Activity and Mechanism of Action of Zinc Oxide Nanoparticles against Campylobacter Jejuni. Appl. Environ. Microbiol. 2011, 77(7), 2325-2331
5. Sirelkhatim, A.; Mahmud ,S .; Seeni , A. ; Kaus, N. H. M. ; Ann, L. C. ; Bakhori ,S.K. M. ; Hasan ,H. ; Mohamad ,D.Review on Zinc Oxide Nanoparticles: Antibacterial Activity and Toxicity Mechanism Nano-Micro Lett. 2015, 7(3),219–242
